# Supplementary material for: Overcoming the loss of blue sensitivity through opsin duplication in the largest animal group, beetles
Source: PubMed Central journal article supplement (PMC5428366; doi:10.1038/s41598-017-00061-7), 2017-01-31
Supplement: 41598_2017_61_MOESM1_ESM.pdf [file 41598_2017_61_MOESM1_ESM.pdf]

# **Overcoming the loss of blue sensitivity through opsin duplication in the largest animal group, beetles**

Camilla R. Sharkey\*<sup>1</sup>, M. Stanley Fujimoto<sup>2</sup>, Nathan P. Lord<sup>3</sup>, Seungwan Shin<sup>4</sup>, Duane D. McKenna<sup>4</sup>, Anton Suvorov<sup>1</sup>, Gavin J. Martin<sup>1</sup>, Seth M. Bybee<sup>1</sup>

<sup>1</sup> Department of Biology, Brigham Young University, 4102 LSB, Provo, UT 84602, USA.

<sup>2</sup> Computer Science Department, Brigham Young University, Provo, Utah 84602, USA.

<sup>3</sup> Department of Biological and Environmental Sciences, Georgia College & State University, Campus Box 081, Milledgeville, GA 31061, USA.

<sup>4</sup> Department of Biological Sciences, University of Memphis, 3700 Walker Avenue, Memphis, TN 38152, USA.

\*Correspondence: [camilla.r.sharkey@gmail.com](mailto:camilla.r.sharkey@gmail.com)

**Supplementary Data**

a

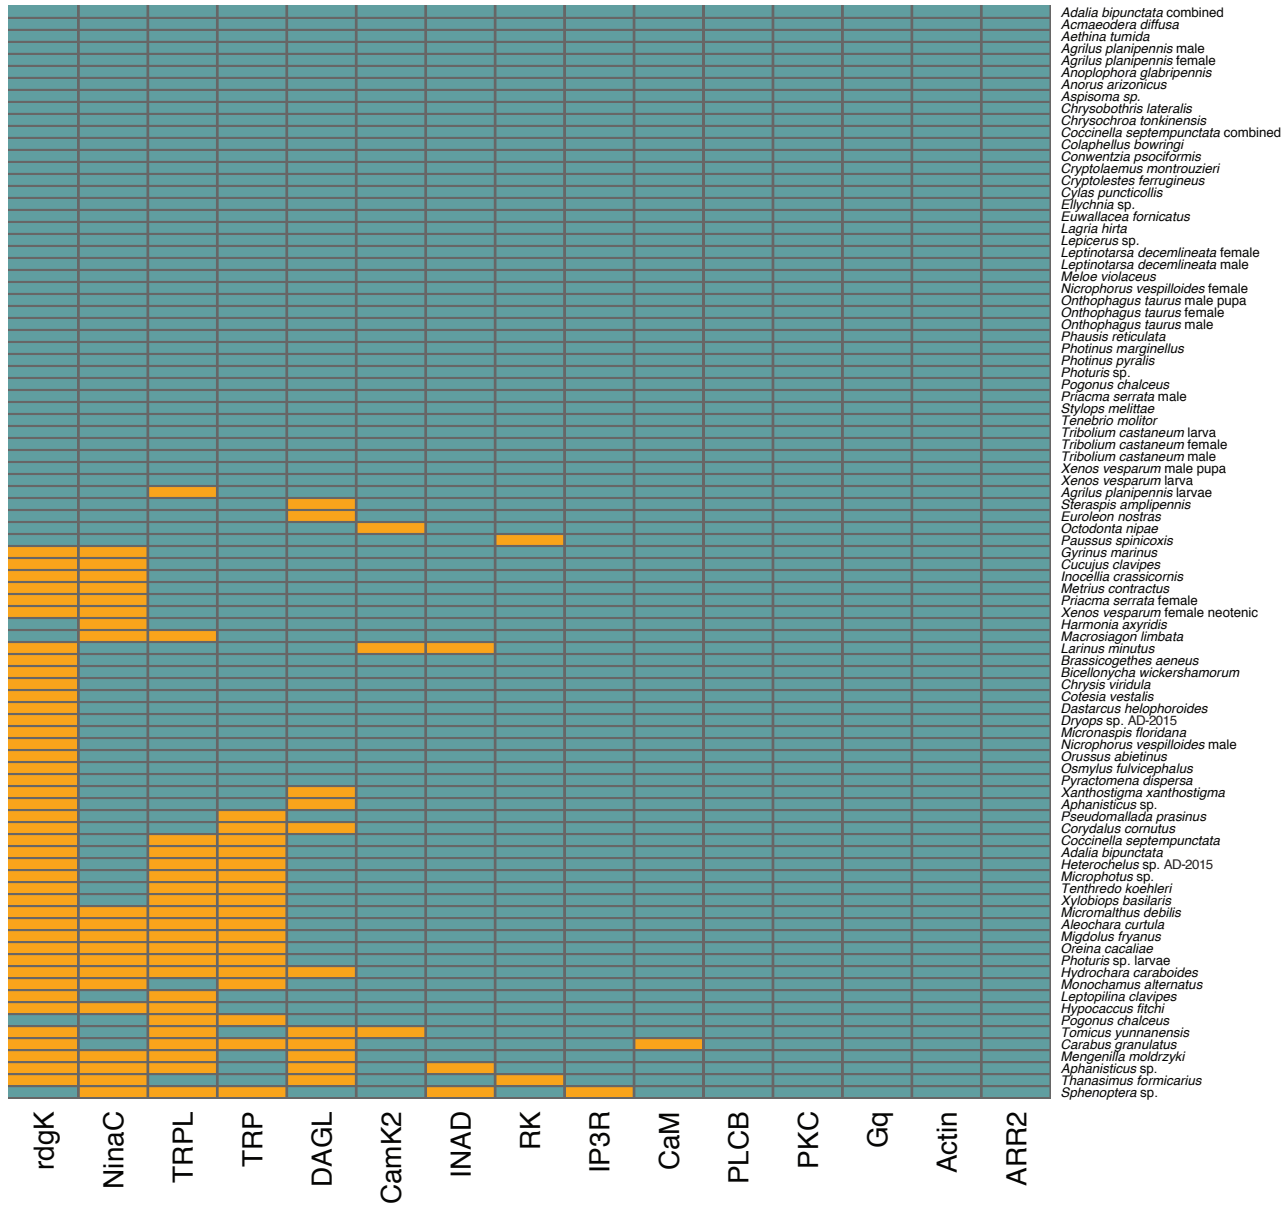

b

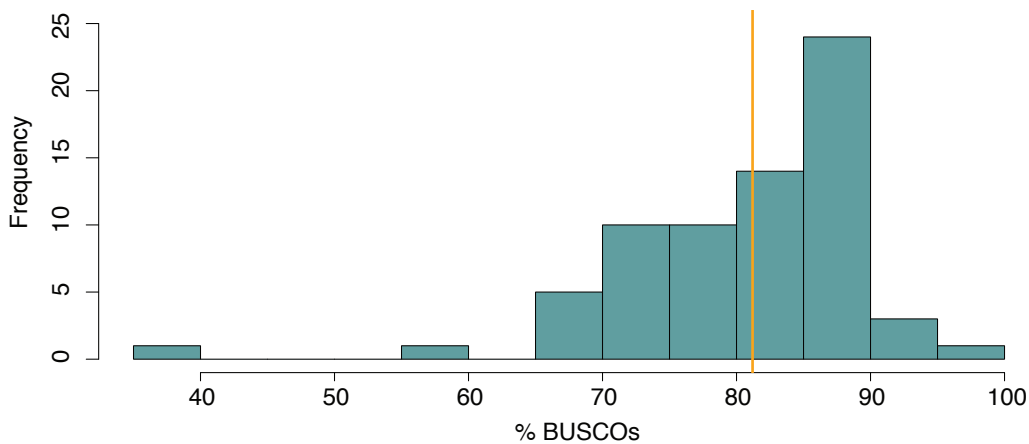

Figure S1. a: Heatmap showing the presence (blue) or absence (orange) of 15 insect phototransduction genes for each transcriptome assembly used in this study. Orthologs were detected at a conservative threshold of  $e^{-100}$ .

b: The distribution of BUSCOs (Benchmarking Universal Single-Copy Orthologs) across all whole-body samples and the mean value (orange line). Higher values denote a larger proportion of BUSCOs present and therefore indicate a more complete transcriptome.

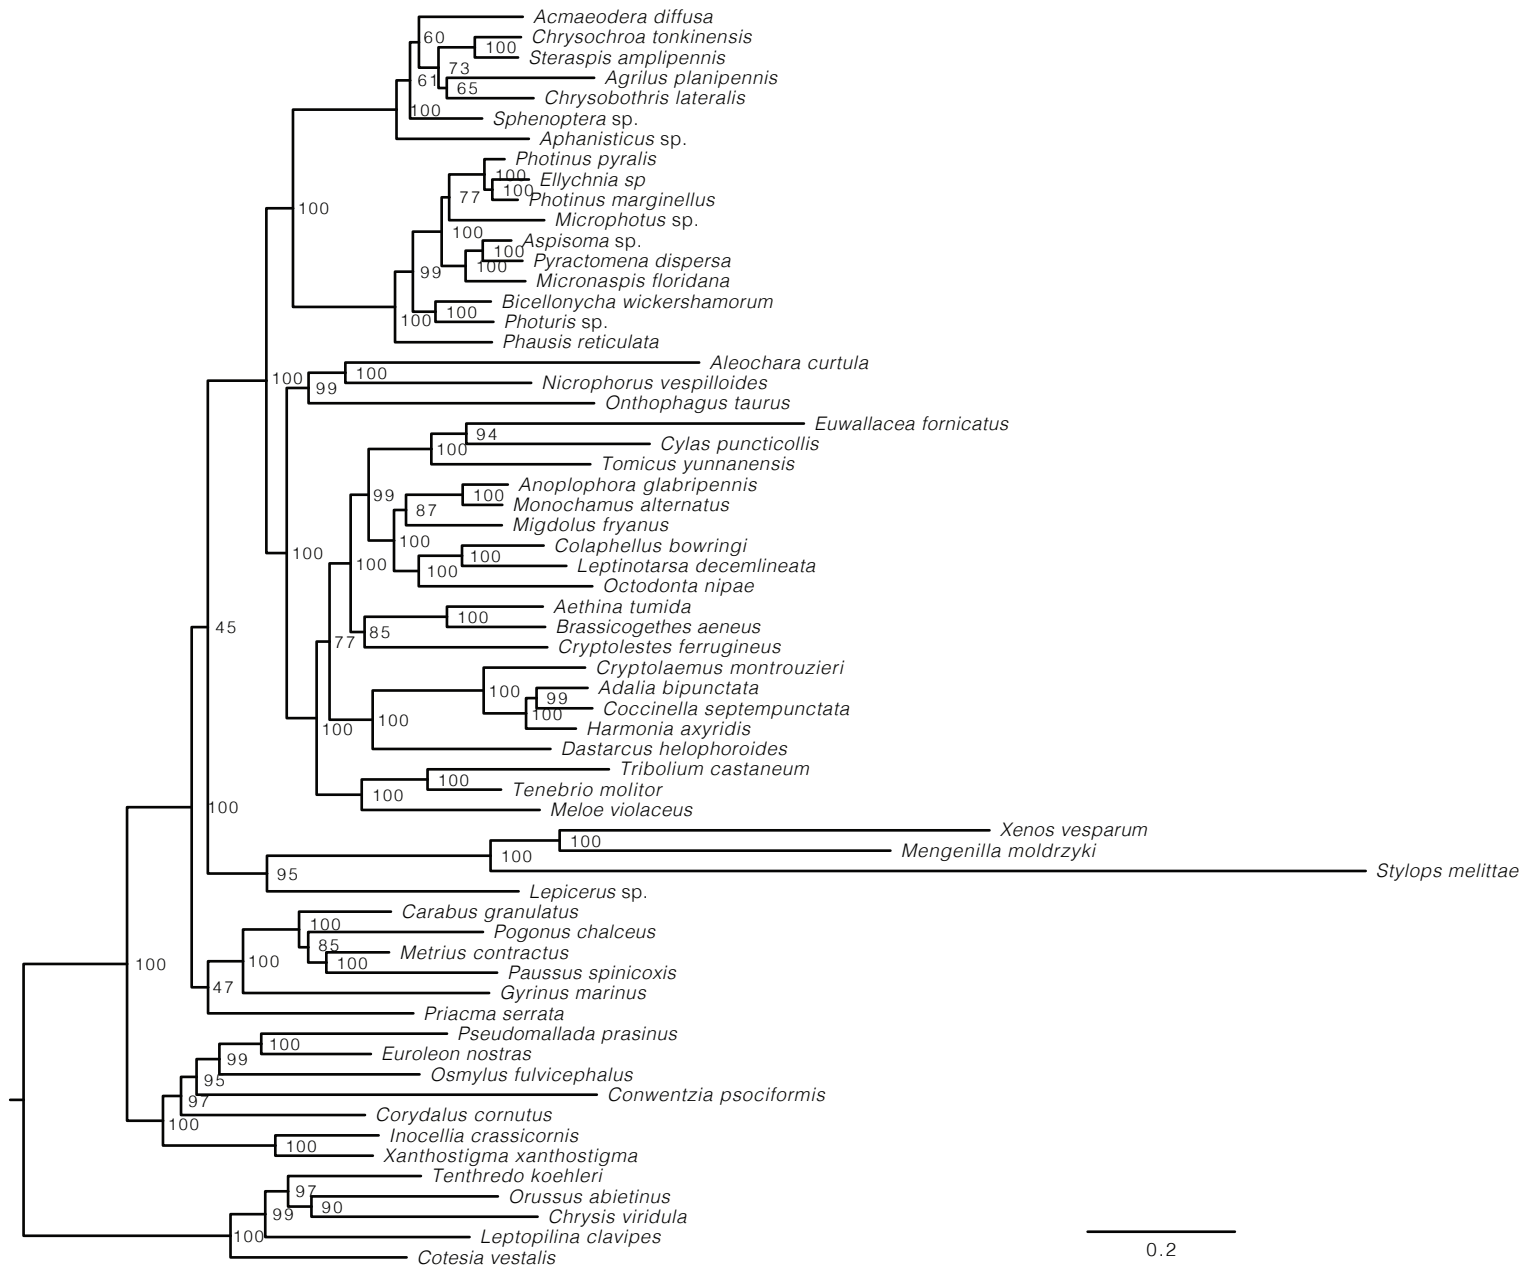

Figure S2. Full maximum-likelihood species phylogeny, including poorly supported strepsipterans (*Xenos* sp., *Mengenilla* sp. and *Stylops* sp.), using 358 gene clusters from translated transcriptome assemblies. Node values indicate UFboot supports. Five hymenopteran species were used as an outgroup.

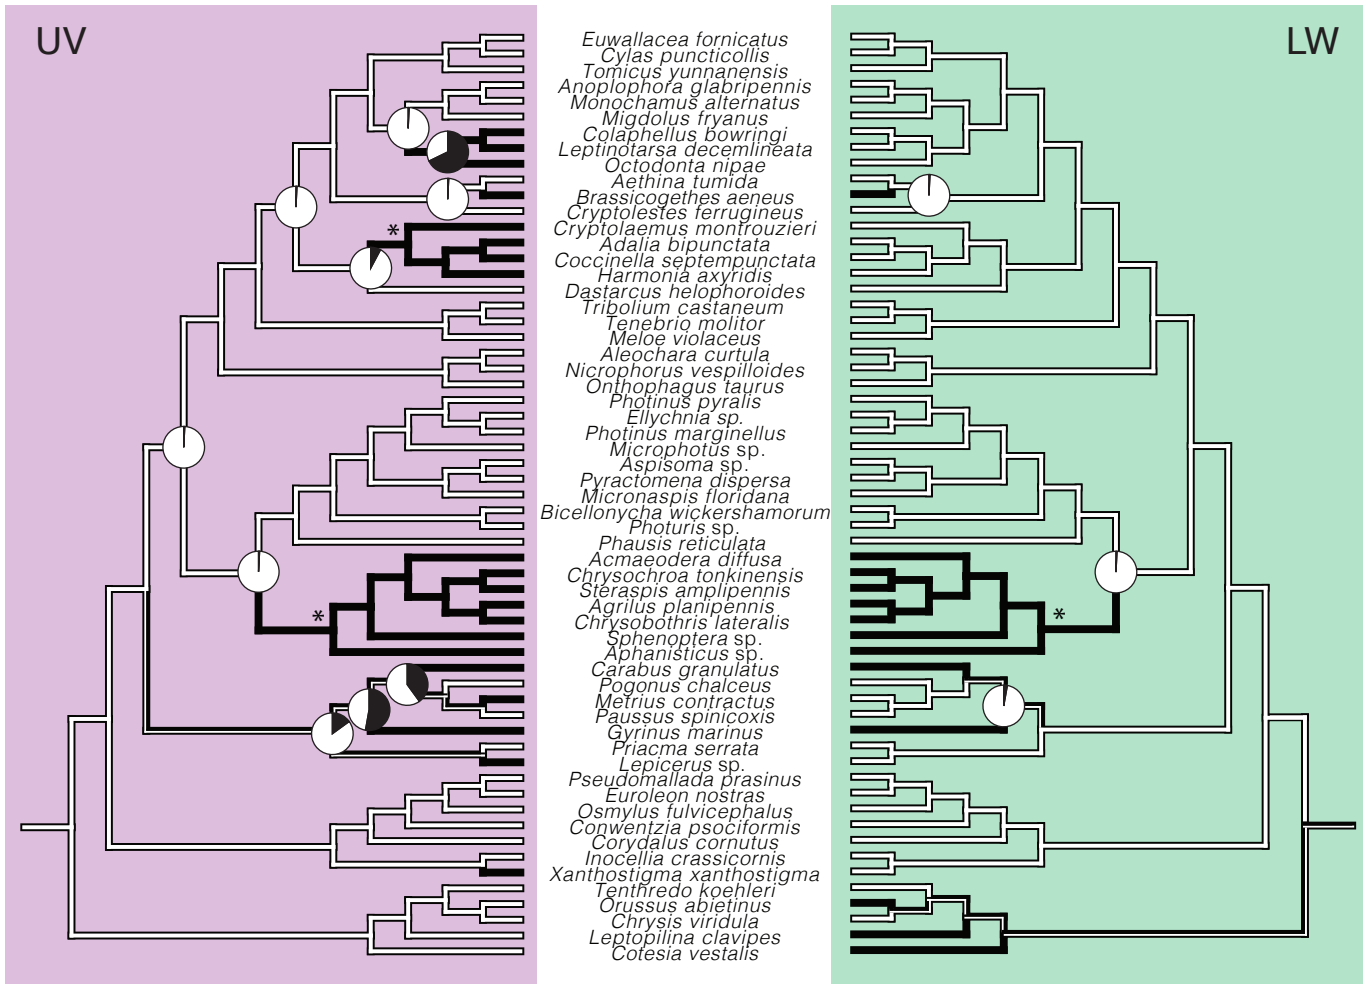

Figure S3. Ancestral state reconstruction for the presence or absence of UV (purple) and LW (green) opsin duplications for all species included in the species phylogeny. The probability that an opsin duplication is present is indicated on the topology (parsimony) and proportionally represented on nodes of interest (likelihood). Black and white indicate the presence or absence of a duplication, respectively. Asterisks denote a likelihood of 1.



| Order         | Species                            | Family          | Superfamily/Suborder | UV | SW | LW |
|---------------|------------------------------------|-----------------|----------------------|----|----|----|
| Coleoptera    | <i>Carabus granulatus</i>          | Carabidae       | Adephaga             | 2  | 0  | 2  |
| Coleoptera    | <i>Metrius contractus</i>          | Carabidae       | Adephaga             | 2* | 0  | 1  |
| Coleoptera    | <i>Paussus spinicoxis</i>          | Carabidae       | Adephaga             | 1  | 0  | 1  |
| Coleoptera    | <i>Pogonus chalceus</i>            | Carabidae       | Adephaga             | 1  | 0  | 1  |
| Coleoptera    | <i>Gyrinus marinus</i>             | Gyrinidae       | Adephaga             | 2  | 0  | 2  |
| Coleoptera    | <i>Micromalthus debilis</i>        | Micromalthidae  | Archostemata         | 1  | 0  | 1  |
| Coleoptera    | <i>Thanasimus formicarius</i>      | Cleridae        | Cleroidea            | 2  | 0  | 1  |
| Coleoptera    | <i>Xylobiops basilaris</i>         | Bostrichidae    | Bostrichoidea        | 1  | 0  | 1  |
| Coleoptera    | <i>Acmaeodera diffusa</i>          | Buprestidae     | Buprestoidea         | 2  | 0  | 2  |
| Coleoptera    | <i>Agrilus planipennis</i>         | Buprestidae     | Buprestoidea         | 2  | 0  | 2  |
| Coleoptera    | <i>Aphanisticus</i> sp.            | Buprestidae     | Buprestoidea         | 2  | 0  | 2  |
| Coleoptera    | <i>Chrysobothris lateralis</i>     | Buprestidae     | Buprestoidea         | 2  | 0  | 2  |
| Coleoptera    | <i>Chrysochroa tonkinensis</i>     | Buprestidae     | Buprestoidea         | 2  | 0  | 2  |
| Coleoptera    | <i>Sphenoptera</i> sp.             | Buprestidae     | Buprestoidea         | 2  | 0  | 2  |
| Coleoptera    | <i>Steraspis amplipennis</i>       | Buprestidae     | Buprestoidea         | 2  | 0  | 2  |
| Coleoptera    | <i>Dryops</i> sp. AD-2015          | Dryopidae       | Byrrhoidea           | 2  | 0  | 1  |
| Coleoptera    | <i>Anoplophora glabripennis</i>    | Cerambycidae    | Chrysomeloidea       | 1  | 0  | 1  |
| Coleoptera    | <i>Monochamus alternatus</i>       | Cerambycidae    | Chrysomeloidea       | 0  | 0  | 1  |
| Coleoptera    | <i>Colaphellus bowringi</i>        | Chrysomelidae   | Chrysomeloidea       | 2  | 0  | 1  |
| Coleoptera    | <i>Leptinotarsa decemlineata</i>   | Chrysomelidae   | Chrysomeloidea       | 2  | 0  | 1  |
| Coleoptera    | <i>Octodonta nipae</i>             | Chrysomelidae   | Chrysomeloidea       | 2  | 0  | 1  |
| Coleoptera    | <i>Oreina cacaliae</i>             | Chrysomelidae   | Chrysomeloidea       | 3* | 0  | 1  |
| Coleoptera    | <i>Migdolus fryanus</i>            | Vesperidae      | Chrysomeloidea       | 2  | 0  | 1  |
| Coleoptera    | <i>Cryptolaemus montrouzieri</i>   | Coccinellidae   | Coccinelloidea       | 2  | 0  | 1  |
| Coleoptera    | <i>Dastarcus helophoroides</i>     | Bothrideridae   | Cucujoidea           | 0  | 0  | 1  |
| Coleoptera    | <i>Adalia bipunctata</i>           | Coccinellidae   | Cucujoidea           | 2  | 0  | 1  |
| Coleoptera    | <i>Coccinella septempunctata</i>   | Coccinellidae   | Cucujoidea           | 2  | 0  | 1  |
| Coleoptera    | <i>Harmonia axyridis</i>           | Coccinellidae   | Cucujoidea           | 2  | 0  | 1  |
| Coleoptera    | <i>Cryptolestes ferrugineus</i>    | Laemophloeidae  | Cucujoidea           | 1  | 0  | 1  |
| Coleoptera    | <i>Aethina tumida</i>              | Nitidulidae     | Cucujoidea           | 1  | 0  | 1  |
| Coleoptera    | <i>Brassicogethes aeneus</i>       | Nitidulidae     | Cucujoidea           | 3  | 0  | 2  |
| Coleoptera    | <i>Priacma serrata</i>             | Cupedidae       | Archostemata         | 1  | 0  | 1  |
| Coleoptera    | <i>Cylas puncticollis</i>          | Curculionidae   | Curculionoidea       | 1  | 0  | 1  |
| Coleoptera    | <i>Dendroctonus ponderosae</i>     | Curculionidae   | Curculionoidea       | 1  | 0  | 1  |
| Coleoptera    | <i>Hypothenemus hampei</i>         | Curculionidae   | Curculionoidea       | 1  | 0  | 1  |
| Coleoptera    | <i>Larinus minutus</i>             | Curculionidae   | Curculionoidea       | 1  | 0  | 3  |
| Coleoptera    | <i>Euwallacea fornicatus</i>       | Scolytinae      | Curculionoidea       | 1  | 0  | 1  |
| Coleoptera    | <i>Tomiscus yunnanensis</i>        | Scolytinae      | Curculionoidea       | 2* | 0  | 1  |
| Coleoptera    | <i>Anorus arizonicus</i>           | Dascillidae     | Dascilloidea         | 1  | 0  | 1  |
| Coleoptera    | <i>Aspisoma</i> sp.                | Lampyridae      | Elateroidea          | 1  | 0  | 1  |
| Coleoptera    | <i>Bicellonycha wickershamorum</i> | Lampyridae      | Elateroidea          | 1  | 0  | 1  |
| Coleoptera    | <i>Ellychnia</i> sp.               | Lampyridae      | Elateroidea          | 1  | 0  | 1  |
| Coleoptera    | <i>Micronaspis floridana</i>       | Lampyridae      | Elateroidea          | 1  | 0  | 1  |
| Coleoptera    | <i>Microphotus</i> sp.             | Lampyridae      | Elateroidea          | 1  | 0  | 0  |
| Coleoptera    | <i>Phausis reticulata</i>          | Lampyridae      | Elateroidea          | 1  | 0  | 1  |
| Coleoptera    | <i>Photinus marginellus</i>        | Lampyridae      | Elateroidea          | 1  | 0  | 1  |
| Coleoptera    | <i>Photinus pyralis</i>            | Lampyridae      | Elateroidea          | 1  | 0  | 1  |
| Coleoptera    | <i>Photuris</i> sp.                | Lampyridae      | Elateroidea          | 1  | 0  | 1  |
| Coleoptera    | <i>Pyractomena dispersa</i>        | Lampyridae      | Elateroidea          | 1  | 0  | 1  |
| Coleoptera    | <i>Hydrochara caraboides</i>       | Hydrophilidae   | Hydrophiloidea       | 1  | 0  | 1  |
| Coleoptera    | <i>Lepicerus</i> sp.               | Lepiceridae     | Myxophaga            | 2  | 0  | 1  |
| Coleoptera    | <i>Cucujus clavipes</i>            | Cucujidae       | Cucujoidea           | 1  | 0  | 1  |
| Coleoptera    | <i>Heterochelus</i> sp. AD-2015    | Scarabaeidae    | Scarabaeoidea        | 1  | 0  | 2  |
| Coleoptera    | <i>Onthophagus taurus</i>          | Scarabaeidae    | Scarabaeoidea        | 1  | 0  | 1  |
| Coleoptera    | <i>Nicrophorus vespilloides</i>    | Silphidae       | Staphylinoidea       | 1  | 0  | 1  |
| Coleoptera    | <i>Aleochara curtula</i>           | Staphylinidae   | Staphylinoidea       | 1  | 0  | 1  |
| Coleoptera    | <i>Meloe violaceus</i>             | Meloidae        | Tenebrionoidea       | 1  | 0  | 1  |
| Coleoptera    | <i>Macrosiagon limbatum</i>        | Rhipiphoridae   | Tenebrionoidea       | 1  | 0  | 1  |
| Coleoptera    | <i>Hypocaccus fitchi</i>           | Histeridae      | Histeroidea          | 1  | 0  | 1  |
| Coleoptera    | <i>Lagria hirta</i>                | Tenebrionidae   | Tenebrionoidea       | 1  | 0  | 1  |
| Coleoptera    | <i>Tenebrio molitor</i>            | Tenebrionidae   | Tenebrionoidea       | 0  | 0  | 1  |
| Coleoptera    | <i>Tribolium castaneum</i>         | Tenebrionidae   | Tenebrionoidea       | 1  | 0  | 1  |
| Strepsiptera  | <i>Mengenilla moldrzyki</i>        | Mengenillidae   | -                    | 1  | 0  | 2  |
| Strepsiptera  | <i>Stylops melittae</i>            | Stylopidae      | -                    | 1  | 0  | 1  |
| Strepsiptera  | <i>Xenos vesparum</i>              | Xenidae         | -                    | 2  | 0  | 6  |
| Raphidioptera | <i>Xanthostigma xanthostigma</i>   | Raphidiidae     | -                    | 2  | 0  | 1  |
| Raphidioptera | <i>Inocellia crassicornis</i>      | Inocelliidae    | Raphidiomorpha       | 1  | 0  | 1  |
| Megaloptera   | <i>Corydalus cornutus</i>          | Corydalidae     | -                    | 1  | 0  | 1  |
| Neuroptera    | <i>Osmylus fulvicephalus</i>       | Osmylidae       | -                    | 1  | 0  | 1  |
| Neuroptera    | <i>Pseudomallada prasinus</i>      | Chrysopidae     | Chrysopoidea         | 1  | 0  | 1  |
| Neuroptera    | <i>Conwentzia psociformis</i>      | Coniopterygidae | Coniopterygoidea     | 1  | 0  | 1  |
| Neuroptera    | <i>Euroleon nostras</i>            | Myrmeleontidae  | Myrmeleontoidea      | 1  | 0  | 1  |
| Hymenoptera   | <i>Chrysis viridula</i>            | Chrysididae     | Chrysidioidea        | 1  | 1  | 1  |
| Hymenoptera   | <i>Leptopilina clavipes</i>        | Figitidae       | Cynipoidea           | 1  | 1  | 2  |
| Hymenoptera   | <i>Cotesia vestalis</i>            | Braconidae      | Ichneumonoidea       | 1  | 1  | 2  |
| Hymenoptera   | <i>Orussus abietinus</i>           | Orussidae       | Orussoidea           | 1  | 1  | 2  |
| Hymenoptera   | <i>Tenthredo koehleri</i>          | Tenthredinidae  | Tenthredinoidea      | 1  | 1  | 1  |

Table S2. Opsin copy number for all species sampled in this study. Asterisks indicate two opsin duplicates that do not overlap and therefore may represent a single opsin copy.

| Opsin sequence                        | length (AAs) | Sequence identity (AA) (%) | Sequence identity (nucleotide) (%) | Sequence coverage (AA) (%) |
|---------------------------------------|--------------|----------------------------|------------------------------------|----------------------------|
| <i>Acmaeodera diffusa</i> LW1         | 379          | 61                         | 66                                 | 94                         |
| <i>Acmaeodera diffusa</i> LW2         | 378          |                            |                                    |                            |
| <i>Acmaeodera diffusa</i> UV1         | 377          | 63                         | 65                                 | 91                         |
| <i>Acmaeodera diffusa</i> UV2         | 390          |                            |                                    |                            |
| <i>Adalia bipunctata</i> LW           | 375          |                            |                                    |                            |
| <i>Adalia bipunctata</i> UV1          | 391          | 84                         | 77                                 | 96                         |
| <i>Adalia bipunctata</i> UV2          | 389          |                            |                                    |                            |
| <i>Aethina tumida</i> LW              | 380          |                            |                                    |                            |
| <i>Aethina tumida</i> UV              | 382          |                            |                                    |                            |
| <i>Agrilus planipennis</i> LW1        | 379          | 69                         | 70                                 | 98                         |
| <i>Agrilus planipennis</i> LW2        | 380          |                            |                                    |                            |
| <i>Agrilus planipennis</i> LW3        | 327          |                            |                                    |                            |
| <i>Agrilus planipennis</i> UV1        | 372          | 72                         | 69                                 | 91                         |
| <i>Agrilus planipennis</i> UV2        | 394          |                            |                                    |                            |
| <i>Aleochara curtula</i> LW           | 381          |                            |                                    |                            |
| <i>Aleochara curtula</i> UV           | 380          |                            |                                    |                            |
| <i>Anoplophora glabripennis</i> LW    | 377          |                            |                                    |                            |
| <i>Anoplophora glabripennis</i> UV    | 319          |                            |                                    |                            |
| <i>Anorus arizonicus</i> LW           | 378          |                            |                                    |                            |
| <i>Anorus arizonicus</i> UV           | 386          |                            |                                    |                            |
| <i>Aphanisticus</i> sp. LW1           | 269          | 69                         | 67                                 | 74                         |
| <i>Aphanisticus</i> sp. LW2           | 381          |                            |                                    |                            |
| <i>Aphanisticus</i> sp. UV1           | 377          | 72                         | 70                                 | 96                         |
| <i>Aphanisticus</i> sp. UV2           | 375          |                            |                                    |                            |
| <i>Aspisoma</i> sp. LW                | 380          |                            |                                    |                            |
| <i>Aspisoma</i> sp. UV                | 397          |                            |                                    |                            |
| <i>Bicellonycha wickershamorum</i> LW | 380          |                            |                                    |                            |
| <i>Bicellonycha wickershamorum</i> UV | 385          |                            |                                    |                            |
| <i>Brassicogethes aeneus</i> LW1      | 398          | 78                         | 74                                 | 94                         |
| <i>Brassicogethes aeneus</i> LW2      | 381          |                            |                                    |                            |
| <i>Brassicogethes aeneus</i> UV1      | 380          | 82                         | 74                                 | 79                         |
| <i>Brassicogethes aeneus</i> UV3      | 278          |                            |                                    |                            |
| <i>Brassicogethes aeneus</i> UV2      | 382          |                            |                                    |                            |
| <i>Carabus granulatus</i> LW1         | 364          | 100                        | 99                                 | 53                         |
| <i>Carabus granulatus</i> LW2         | 137          |                            |                                    |                            |
| <i>Carabus granulatus</i> UV1         | 123          | 87                         | 74                                 | 32                         |
| <i>Carabus granulatus</i> UV2         | 381          |                            |                                    |                            |
| <i>Chrysobothris lateralis</i> LW1    | 381          | 69                         | 69                                 | 99                         |
| <i>Chrysobothris lateralis</i> LW2    | 380          |                            |                                    |                            |
| <i>Chrysobothris lateralis</i> UV1    | 375          | 68                         | 70                                 | 97                         |
| <i>Chrysobothris lateralis</i> UV2    | 378          |                            |                                    |                            |
| <i>Chrysochroa tonkinensis</i> LW1    | 381          | 68                         | 71                                 | 99                         |
| <i>Chrysochroa tonkinensis</i> LW2    | 380          |                            |                                    |                            |
| <i>Chrysochroa tonkinensis</i> UV1    | 385          | 74                         | 70                                 | 96                         |
| <i>Chrysochroa tonkinensis</i> UV2    | 371          |                            |                                    |                            |
| <i>Coccinella septempunctata</i> LW   | 375          |                            |                                    |                            |
| <i>Coccinella septempunctata</i> UV1  | 396          | 83                         | 78                                 | 98                         |
| <i>Coccinella septempunctata</i> UV2  | 389          |                            |                                    |                            |
| <i>Colaphellus bowringi</i> LW        | 375          |                            |                                    |                            |
| <i>Colaphellus bowringi</i> UV1       | 360          | 77                         | 75                                 | 58                         |
| <i>Colaphellus bowringi</i> UV2       | 181          |                            |                                    |                            |
| <i>Conwentzia psociformis</i> LW      | 371          |                            |                                    |                            |
| <i>Conwentzia psociformis</i> UV      | 380          |                            |                                    |                            |
| <i>Corydalus cornutus</i> LW          | 376          |                            |                                    |                            |
| <i>Corydalus cornutus</i> UV          | 347          |                            |                                    |                            |
| <i>Cryptolaemus montrouzieri</i> LW   | 376          |                            |                                    |                            |
| <i>Cryptolaemus montrouzieri</i> UV1a | 398          | 86                         | 79                                 | 95                         |
| <i>Cryptolaemus montrouzieri</i> UV1b | 376          |                            |                                    |                            |
| <i>Cryptolestes ferrugineus</i> LW    | 378          |                            |                                    |                            |
| <i>Cryptolestes ferrugineus</i> UV    | 236          |                            |                                    |                            |
| <i>Cucujus clavipes</i> LW            | 378          |                            |                                    |                            |
| <i>Cucujus clavipes</i> UV            | 391          |                            |                                    |                            |
| <i>Cylas puncticollis</i> LW          | 379          |                            |                                    |                            |
| <i>Cylas puncticollis</i> UV          | 374          |                            |                                    |                            |
| <i>Dastarcus helophoroides</i> LW     | 378          |                            |                                    |                            |
| <i>Dendroctonus ponderosae</i> LW     | 379          |                            |                                    |                            |
| <i>Dendroctonus ponderosae</i> UV     | 368          |                            |                                    |                            |
| <i>Dryops</i> sp. AD-2015 LW          | 382          |                            |                                    |                            |
| <i>Dryops</i> sp. AD-2015 UV1         | 181          | 81                         | 75                                 | 55                         |
| <i>Dryops</i> sp. AD-2015 UV2         | 370          |                            |                                    |                            |
| <i>Ellychnia</i> sp. LW               | 379          |                            |                                    |                            |
| <i>Ellychnia</i> sp. UV               | 389          |                            |                                    |                            |
| <i>Euroleon nostras</i> LW            | 371          |                            |                                    |                            |
| <i>Euroleon nostras</i> UV            | 376          |                            |                                    |                            |
| <i>Euwallacea fornicatus</i> LW       | 378          |                            |                                    |                            |
| <i>Euwallacea fornicatus</i> UV       | 375          |                            |                                    |                            |
| <i>Gyrinus marinus</i> LW1            | 379          | 93                         | 90                                 | 36                         |
| <i>Gyrinus marinus</i> LW2            | 104          |                            |                                    |                            |
| <i>Gyrinus marinus</i> UV1            | 387          | 89                         | 85                                 | 73                         |
| <i>Gyrinus marinus</i> UV2            | 276          |                            |                                    |                            |
| <i>Harmonia axyridis</i> LW           | 361          |                            |                                    |                            |
| <i>Harmonia axyridis</i> UV1          | 393          | 81                         | 75                                 | 73                         |
| <i>Harmonia axyridis</i> UV2          | 371          |                            |                                    |                            |
| <i>Heterochelus</i> sp. AD-2015 LW1   | 151          | 81                         | 91                                 | 44                         |
| <i>Heterochelus</i> sp. AD-2015 LW2   | 376          |                            |                                    |                            |
| <i>Heterochelus</i> sp. AD-2015 UV    | 213          |                            |                                    |                            |
| <i>Hydrochara caraboides</i> LW       | 385          |                            |                                    |                            |
| <i>Hydrochara caraboides</i> UV       | 323          |                            |                                    |                            |
| <i>Hypocaccus fitchi</i> LW           | 381          |                            |                                    |                            |
| <i>Hypocaccus fitchi</i> UV           | 180          |                            |                                    |                            |
| <i>Hypothenemus hampei</i> LW         | 317          |                            |                                    |                            |
| <i>Hypothenemus hampei</i> UV         | 323          |                            |                                    |                            |
| <i>Inocellia crassicornis</i> LW      | 378          |                            |                                    |                            |
| <i>Inocellia crassicornis</i> UV      | 109          |                            |                                    |                            |
| <i>Largria hirta</i> LW               | 410          |                            |                                    |                            |
| <i>Largria hirta</i> UV               | 379          |                            |                                    |                            |
| <i>Larinus minutus</i> LW1            | 219          | 79                         | 87                                 | 71                         |
| <i>Larinus minutus</i> LW3            | 379          |                            |                                    |                            |
| <i>Larinus minutus</i> LW2            | 149          |                            |                                    |                            |
| <i>Larinus minutus</i> UV             | 376          |                            |                                    |                            |
| <i>Lepicerus</i> sp. LW               | 375          |                            |                                    |                            |
| <i>Lepicerus</i> sp. UV1              | 188          | 95                         | 88                                 | 49                         |
| <i>Lepicerus</i> sp. UV2              | 389          |                            |                                    |                            |
| <i>Leptinotarsa decemlineata</i> LW   | 410          |                            |                                    |                            |
| <i>Leptinotarsa decemlineata</i> UV1  | 379          | 74                         | 73                                 | 96                         |
| <i>Leptinotarsa decemlineata</i> UV2  | 389          |                            |                                    |                            |
| <i>Macrosiagon limbatum</i> LW        | 377          |                            |                                    |                            |
| <i>Macrosiagon limbatum</i> UV        | 378          |                            |                                    |                            |
| <i>Meloe violaceus</i> LW             | 380          |                            |                                    |                            |
| <i>Meloe violaceus</i> UV             | 327          |                            |                                    |                            |
| <i>Mengenilla moldrzyki</i> LW1       | 243          | 66                         | 68                                 | 66                         |
| <i>Mengenilla moldrzyki</i> LW2       | 383          |                            |                                    |                            |
| <i>Mengenilla moldrzyki</i> UV        | 135          |                            |                                    |                            |
| <i>Metrius contractus</i> LW          | 379          |                            |                                    |                            |
| <i>Metrius contractus</i> UV1         | 197          | -                          | -                                  | 0                          |
| <i>Metrius contractus</i> UV2         | 138          |                            |                                    |                            |
| <i>Micromalthus debilis</i> LW        | 134          |                            |                                    |                            |
| <i>Micromalthus debilis</i> UV        | 379          |                            |                                    |                            |
| <i>Micronaspis floridana</i> LW       | 380          |                            |                                    |                            |
| <i>Micronaspis floridana</i> UV       | 394          |                            |                                    |                            |
| <i>Microphotus</i> sp. UV             | 389          |                            |                                    |                            |
| <i>Migdolus fryanus</i> LW            | 360          |                            |                                    |                            |
| <i>Monochamus alternatus</i> LW       | 378          |                            |                                    |                            |
| <i>Nicrophorus vespilloides</i> LW    | 380          |                            |                                    |                            |
| <i>Nicrophorus vespilloides</i> UV    | 388          |                            |                                    |                            |
| <i>Octodonta nipae</i> LW             | 380          |                            |                                    |                            |
| <i>Octodonta nipae</i> UV1            | 379          | 65                         | 71                                 | 98                         |
| <i>Octodonta nipae</i> UV2            | 380          |                            |                                    |                            |
| <i>Onthophagus taurus</i> LW          | 393          |                            |                                    |                            |
| <i>Onthophagus taurus</i> UV          | 376          |                            |                                    |                            |
| <i>Oreina cacaliae</i> LW             | 377          |                            |                                    |                            |
| <i>Oreina cacaliae</i> UV1a           | 126          | 66                         | 71                                 | 96                         |
| <i>Oreina cacaliae</i> UV2            | 184          |                            |                                    |                            |
| <i>Oreina cacaliae</i> UV1b           | 161          |                            |                                    |                            |
| <i>Osmylus fulvicephalus</i> LW       | 372          |                            |                                    |                            |
| <i>Osmylus fulvicephalus</i> UV       | 256          |                            |                                    |                            |
| <i>Paussus spinicoxis</i> LW          | 381          |                            |                                    |                            |
| <i>Paussus spinicoxis</i> UV          | 385          |                            |                                    |                            |
| <i>Phausis reticulata</i> LW          | 413          |                            |                                    |                            |
| <i>Phausis reticulata</i> UV          | 404          |                            |                                    |                            |
| <i>Photinus marginellus</i> LW        | 379          |                            |                                    |                            |
| <i>Photinus marginellus</i> UV        | 401          |                            |                                    |                            |
| <i>Photinus pyralis</i> LW            | 379          |                            |                                    |                            |
| <i>Photinus pyralis</i> UV            | 392          |                            |                                    |                            |
| <i>Photuris</i> sp. LW                | 381          |                            |                                    |                            |
| <i>Photuris</i> sp. UV                | 386          |                            |                                    |                            |
| <i>Pogonus chalceus</i> LW            | 383          |                            |                                    |                            |
| <i>Pogonus chalceus</i> UV            | 386          |                            |                                    |                            |
| <i>Priacma serrata</i> LW             | 378          |                            |                                    |                            |
| <i>Priacma serrata</i> UV             | 376          |                            |                                    |                            |
| <i>Pseudomallada prasinus</i> LW      | 372          |                            |                                    |                            |
| <i>Pseudomallada prasinus</i> UV      | 395          |                            |                                    |                            |
| <i>Pyraclomena dispersa</i> LW        | 380          |                            |                                    |                            |
| <i>Pyraclomena dispersa</i> UV        | 402          |                            |                                    |                            |
| <i>Sphenoptera</i> sp. LW1            | 386          | 71                         | 70                                 | 96                         |
| <i>Sphenoptera</i> sp. LW2            | 380          |                            |                                    |                            |
| <i>Sphenoptera</i> sp. UV1            | 381          | 73                         | 70                                 | 96                         |
| <i>Sphenoptera</i> sp. UV2            | 373          |                            |                                    |                            |
| <i>Steraspis amplipennis</i> LW1      | 381          | 70                         | 70                                 | 99                         |
| <i>Steraspis amplipennis</i> LW2      | 380          |                            |                                    |                            |
| <i>Steraspis amplipennis</i> UV1      | 379          | 72                         | 69                                 | 92                         |
| <i>Steraspis amplipennis</i> UV2      | 375          |                            |                                    |                            |
| <i>Stylops melittae</i> LW            | 237          |                            |                                    |                            |
| <i>Stylops melittae</i> UV            | 376          |                            |                                    |                            |
| <i>Tenebrio molitor</i> LW            | 386          |                            |                                    |                            |
| <i>Thanasimus formicarius</i> LW      | 359          |                            |                                    |                            |
| <i>Thanasimus formicarius</i> UV1     | 212          | 87                         | 91                                 | 36                         |
| <i>Thanasimus formicarius</i> UV2     | 155          |                            |                                    |                            |
| <i>Tomicus yunnanensis</i> LW         | 379          |                            |                                    |                            |
| <i>Tomicus yunnanensis</i> UV         | 313          |                            |                                    |                            |
| <i>Tribolium castaneum</i> LW         | 379          |                            |                                    |                            |
| <i>Tribolium castaneum</i> UV         | 382          |                            |                                    |                            |
| <i>Xanthostigma xanthostigma</i> LW1  | 375          | 70                         | 69                                 | 96                         |
| <i>Xanthostigma xanthostigma</i> LW2  | 377          |                            |                                    |                            |
| <i>Xanthostigma xanthostigma</i> UV1  | 381          | 87                         | 82                                 | 95                         |
| <i>Xanthostigma xanthostigma</i> UV2  | 394          |                            |                                    |                            |
| <i>Xenos vesparum</i> LW1             | 369          |                            |                                    |                            |
| <i>Xenos vesparum</i> LW2             | 269          |                            |                                    |                            |
| <i>Xenos vesparum</i> LW3             | 208          |                            |                                    |                            |
| <i>Xenos vesparum</i> LW4             | 245          |                            |                                    |                            |
| <i>Xenos vesparum</i> LW5             | 124          |                            |                                    |                            |
| <i>Xenos vesparum</i> LW6             | 328          |                            |                                    |                            |
| <i>Xenos vesparum</i> UV1             | 374          | 96                         | 99                                 | 62                         |
| <i>Xenos vesparum</i> UV2             | 182          |                            |                                    |                            |
| <i>Xylobiops basilaris</i> LW         | 385          |                            |                                    |                            |
| <i>Xylobiops basilaris</i> UV         | 381          |                            |                                    |                            |

Table S3. Lengths of Neuropteroidea opsin protein sequences found in this study. Sequence identity and coverage is compared for opsin duplicates. Opsin sequences derived from RNA-seq data can be found on GenBank with accession numbers KY368182 - KY368379.

| Clade | Family        | Branch | Branch leading to | Site numbers (bovine)                                       | Branch P-value | Test InL  | Null InL  | LRT  |
|-------|---------------|--------|-------------------|-------------------------------------------------------------|----------------|-----------|-----------|------|
| A     | Chrysomelidae | A1     | UV2               | 90 <sup>†</sup> , 91*                                       | 0.002          | -189798.8 | -189803.7 | 9.8  |
| A     | Chrysomelidae | A2     | UV2               | 29*, 107**, 197***, <b>210**</b> , 230***, 339*             | 0.000          | -189796.8 | -189806.7 | 19.7 |
| A     | Chrysomelidae | A3     | UV2               | 136*, 151*                                                  | 0.004          | -189803.7 | -189807.8 | 8.2  |
| A     | Chrysomelidae | A4     | UV1               | 33**, 107*, 127*, 286***, <b>293***</b>                     | 0.000          | -189797.1 | -189803.7 | 13.2 |
| A     | Chrysomelidae | A5     | UV1               | 205*                                                        | 0.021          | -189803.6 | -189806.3 | 5.3  |
| B     | Coccinellidae | B1     | UV1/UV2           | 14***, 31***, 34***, 158*, 159**, 173**, 317*, 333***, 341* | 0.000          | -189810.2 | -189835.0 | 49.8 |
| C     | Buprestidae   | C1     | UV2               | 96*                                                         | 0.046          | -189803.4 | -189805.4 | 4.0  |
| C     | Buprestidae   | C2     | UV2               | 37*, 105**, 108**, <b>112*</b> , 164***                     | 0.000          | -189806.9 | -189819.4 | 24.9 |
| C     | Buprestidae   | C3     | UV1               | 50*, 127*, <b>206***</b>                                    | 0.000          | -189814.8 | -189821.2 | 12.7 |
| C     | Buprestidae   | C4     | UV1               | 22**, 23*                                                   | 0.031          | -189801.4 | -189803.7 | 4.6  |
| C     | Buprestidae   | C5     | UV1               | 176*, 203*, 258*                                            | 0.000          | -189797.3 | -189803.7 | 12.9 |

Table S4. Branches and amino acid sites under positive selection in clades A (Chrysomelidae), B (Coccinellidae) and C (Buprestidae). Sites adjacent to chromophore binding sites are in bold. LRT = Likelihood Ratio Test, InL = log likelihood. Sites are numbered according to bovine rhodopsin. \*\*\*  $P \leq 0.001$  \*\*  $P \leq 0.01$ , \*  $P \leq 0.05$ . † Site 90 is included as it is close to significance ( $P = 0.055$ ) and is an important site for shifts between UV and blue sensitivity in insect photopigments.



| Clade A Chrysomelidae                |       |       |       |       |       |       |       |       |       |       |       |     |     |     |     |     |     |     |  |
|--------------------------------------|-------|-------|-------|-------|-------|-------|-------|-------|-------|-------|-------|-----|-----|-----|-----|-----|-----|-----|--|
| Branch                               | A2    | A4    | A1    | A1    | A2    | -     | A4    | A3    | A3    | A4    | A4    | A2  | A5  | A2  | A2  | A4  | A4  | A2  |  |
| UV clade                             | UV2   | UV1   | UV2   | UV2   | UV2   | -     | UV1   | UV2   | UV2   | UV1   | UV1   | UV2 | UV1 | UV2 | UV2 | UV2 | UV1 | UV2 |  |
| AA site (bovine)                     | 29    | 33    | 90    | 91    | 107   | 113   | 127   | 136   | 151   | 107   | 172   | 197 | 205 | 210 | 230 | 286 | 293 | 339 |  |
| <i>Colaphellus bowringi</i> UV1      | V     | I     | K     | S     | H     | F     | T     | Y     | T     | M     | A     | T   | G   | F   | F   | T   | C   | S   |  |
| <i>Leptinotarsa decemlineata</i> UV1 | L     | V     | K     | S     | Y     | F     | A     | Y     | T     | M     | A     | T   | A   | F   | F   | T   | C   | S   |  |
| <i>Octodonta nipae</i> UV1           | A     | P     | K     | S     | I     | F     | L     | F     | T     | T     | L     | T   | G   | F   | F   | G   | I   | N   |  |
| <i>Oreina cacaliae</i> UV1a          | -     | -     | K     | S     | H     | F     | T     | Y     | T     | M     | T     | -   | -   | -   | -   | -   | -   | -   |  |
| <i>Oreina cacaliae</i> UV1b          | -     | -     | -     | -     | -     | -     | -     | -     | -     | -     | -     | -   | A   | F   | F   | T   | C   | S   |  |
| <i>Colaphellus bowringi</i> UV2      | -     | -     | -     | -     | W     | Y     | M     | Y     | T     | A     | M     | D   | G   | T   | F   | -   | -   | -   |  |
| <i>Leptinotarsa decemlineata</i> UV2 | Q     | P     | V     | M     | W     | Y     | M     | F     | P     | A     | M     | D   | G   | M   | F   | G   | L   | L   |  |
| <i>Octodonta nipae</i> UV2           | I     | P     | S     | I     | I     | Y     | M     | Y     | T     | A     | M     | T   | G   | C   | I   | G   | L   | T   |  |
| <i>Oreina cacaliae</i> UV2           | Q     | P     | V     | M     | W     | Y     | M     | F     | P     | A     | F     | -   | -   | -   | -   | -   | -   | -   |  |
| Clade B Coccinellidae                |       |       |       |       |       |       |       |       |       |       |       |     |     |     |     |     |     |     |  |
| Branch                               | B1    | B1    | B1    | -     | -     | B1    | B1    | B1    | B1    | B1    | B1    |     |     |     |     |     |     |     |  |
| UV clade                             | UV1/2 | UV1/2 | UV1/2 | UV1/2 | UV1/2 | UV1/2 | UV1/2 | UV1/2 | UV1/2 | UV1/2 | UV1/2 |     |     |     |     |     |     |     |  |
| AA site (bovine)                     | 14    | 31    | 34    | 90    | 113   | 158   | 159   | 173   | 317   | 333   | 341   |     |     |     |     |     |     |     |  |
| <i>Adalia bipunctata</i> UV1         | S     | L     | P     | K     | F     | L     | V     | T     | Q     | V     | E     |     |     |     |     |     |     |     |  |
| <i>Coccinella septempunctata</i> UV1 | S     | L     | P     | K     | F     | L     | L     | T     | Q     | V     | E     |     |     |     |     |     |     |     |  |
| <i>Cryptolaemus montrouzieri</i> UV1 | S     | T     | P     | K     | F     | V     | A     | T     | Q     | T     | Q     |     |     |     |     |     |     |     |  |
| <i>Harmonia axyridis</i> UV1         | S     | S     | P     | K     | F     | L     | I     | T     | Q     | V     | E     |     |     |     |     |     |     |     |  |
| <i>Adalia bipunctata</i> UV2         | S     | M     | P     | K     | Y     | L     | G     | T     | Q     | V     | -     |     |     |     |     |     |     |     |  |
| <i>Coccinella septempunctata</i> UV2 | S     | I     | P     | K     | F     | V     | G     | L     | Q     | V     | -     |     |     |     |     |     |     |     |  |
| <i>Cryptolaemus montrouzieri</i> UV2 | S     | M     | P     | K     | F     | L     | G     | T     | L     | V     | -     |     |     |     |     |     |     |     |  |
| <i>Harmonia axyridis</i> UV2         | S     | T     | P     | S     | Y     | L     | G     | I     | Q     | L     | -     |     |     |     |     |     |     |     |  |
| Clade C Buprestidae                  |       |       |       |       |       |       |       |       |       |       |       |     |     |     |     |     |     |     |  |
| Branch                               | C1    | C4    | C4    | C2    | C3    | -     | C2    | C2    | C2    | -     | C3    | C2  | C5  | C3  | C5  | C5  |     |     |  |
| UV clade                             | UV2   | UV1   | UV1   | UV2   | UV1   | -     | UV2   | UV2   | UV2   | -     | UV1   | UV2 | UV1 | UV1 | UV1 | UV1 |     |     |  |
| AA site (bovine)                     | 14    | 22    | 23    | 37    | 50    | 90    | 105   | 108   | 112   | 113   | 127   | 164 | 176 | 206 | 230 | 258 |     |     |  |
| <i>Acmaeodera diffusa</i> UV1        | G     | P     | P     | L     | L     | K     | A     | L     | I     | F     | M     | T   | N   | V   | R   | T   |     |     |  |
| <i>Agrilus planipennis</i> UV1       | A     | P     | T     | L     | L     | K     | T     | L     | I     | F     | I     | T   | N   | A   | R   | T   |     |     |  |
| <i>Aphanisticus</i> sp. UV1          | S     | P     | P     | L     | L     | K     | T     | I     | I     | F     | I     | T   | N   | A   | Q   | T   |     |     |  |
| <i>Chrysobothris lateralis</i> UV1   | A     | P     | P     | L     | M     | K     | T     | I     | I     | F     | V     | T   | N   | A   | R   | T   |     |     |  |
| <i>Chrysochroa tonkinensis</i> UV1   | A     | D     | N     | I     | M     | K     | T     | I     | I     | F     | T     | T   | S   | A   | H   | T   |     |     |  |
| <i>Sphenoptera</i> sp. UV1           | A     | P     | P     | L     | M     | K     | T     | I     | I     | F     | A     | T   | N   | A   | R   | T   |     |     |  |
| <i>Steraspis amplipennis</i> UV1     | A     | D     | S     | I     | M     | E     | T     | I     | I     | F     | A     | T   | G   | A   | H   | T   |     |     |  |
| <i>Acmaeodera diffusa</i> UV2        | S     | S     | P     | L     | M     | K     | L     | V     | V     | F     | M     | V   | G   | T   | D   | C   |     |     |  |
| <i>Agrilus planipennis</i> UV2       | A     | P     | A     | I     | M     | K     | L     | T     | A     | F     | M     | V   | G   | A   | D   | C   |     |     |  |
| <i>Aphanisticus</i> sp. UV2          | P     | P     | A     | I     | M     | K     | L     | T     | T     | F     | M     | V   | G   | A   | N   | C   |     |     |  |
| <i>Chrysobothris lateralis</i> UV2   | Q     | P     | A     | W     | M     | K     | T     | L     | I     | F     | M     | T   | G   | T   | A   | C   |     |     |  |
| <i>Chrysochroa tonkinensis</i> UV2   | A     | P     | A     | L     | M     | K     | G     | V     | I     | F     | M     | T   | G   | G   | D   | C   |     |     |  |
| <i>Sphenoptera</i> sp. UV2           | R     | P     | A     | L     | M     | K     | T     | L     | I     | F     | M     | T   | G   | S   | S   | C   |     |     |  |
| <i>Steraspis amplipennis</i> UV2     | A     | P     | A     | L     | M     | K     | T     | L     | I     | F     | M     | T   | G   | A   | D   | C   |     |     |  |

Table S5. Amino acids present at sites under positive selection, for UV1 and UV2 opsins in clades A (Chrysomelidae), B (Cocclinellidae), and C (Buprestidae). Sites are numbered according to bovine rhodopsin. Sites 90 and 113 are included as they differ between UV1 and UV2 opsins but are invariant in other insect UV opsins.

| Species                         | BioProject ID | Taxonomy ID | TSA accession # | Version      |
|---------------------------------|---------------|-------------|-----------------|--------------|
| <i>Anorus arizonicus</i>        | PRJNA286485   | 1661808     | GDLJ00000000    | GDLJ01000000 |
| <i>Cucujus clavipes</i>         | PRJNA286510   | 186067      | GDNW00000000    | GDNW01000000 |
| <i>Dryops</i> sp. AD-2015       | PRJNA286519   | 1661493     | GDMY00000000    | GDMY01000000 |
| <i>Heterochelus</i> sp. AD-2015 | PRJNA286531   | 1661495     | GDNJ00000000    | GDNJ01000000 |
| <i>Hydrochara caraboides</i>    | PRJNA286534   | 1208885     | GDPR00000000    | GDPR01000000 |
| <i>Hypocaccus fitchi</i>        | PRJNA286537   | 1661832     | GDLI00000000    | GDPQ01000000 |
| <i>Lagria hirta</i>             | PRJNA286540   | 296003      | GDPQ00000000    | GDLA01000000 |
| <i>Larinus minutus</i>          | PRJNA286543   | 1342029     | GDLA00000000    | GDPU01000000 |
| <i>Macrosiagon limbatum</i>     | PRJNA286549   | 1661804     | GDPU00000000    | GDOQ01000000 |
| <i>Micromalthus debilis</i>     | PRJNA286555   | 292448      | GDOQ00000000    | GDPL01000000 |
| <i>Oreina cacaliae</i>          | PRJNA286569   | 63706       | GDPL00000000    | GDPC01000000 |
| <i>Thanasimus formicarius</i>   | PRJNA286592   | 295689      | GDPC00000000    | GDLI01000000 |
| <i>Xylobiops basilaris</i>      | PRJNA286597   | 1661920     | GDNM00000000    | GDNM01000000 |

Table S6. 1KITE sample information (see [www.1kite.org](http://www.1kite.org)). All samples are derived from one project (accession PRJNA183205).

| Opsin sequence                       | Accession #      | Opsin sequence                      | Accession # | Opsin sequence                                  | Accession # |
|--------------------------------------|------------------|-------------------------------------|-------------|-------------------------------------------------|-------------|
| <i>Allodessus bistrigatus</i> UV     | KP219384         | <i>Heliconius melpomene</i> LW      | GU324702    | <i>Nilaparvata lugens</i> LW                    | AB761147    |
| <i>Allodessus bistrigatus</i> LW     | KP219381         | <i>Heliconius erato</i> SW          | AY918906    | <i>Nilaparvata lugens</i> UV1                   | AB761148    |
| <i>Limbodessus palmulaoides</i> LW   | KP219382         | <i>Heliconius erato</i> LW          | AY918907    | <i>Nilaparvata lugens</i> UV2                   | AB761149    |
| <i>Paroster nigroadumbratus</i> UV   | KP219383         | <i>Heliconius erato</i> UV1         | AY918904    | <i>Pieris rapae</i> blue                        | AB208675    |
| <i>Paroster nigroadumbratus</i> LW   | KP219380         | <i>Heliconius erato</i> UV2         | AY918905    | <i>Pieris rapae</i> LW                          | AB177984    |
| <i>Apis cerana</i> SW                | AB355817         | <i>Heliconius sapho</i> SW          | GU324692    | <i>Pieris rapae</i> UV                          | AB208673    |
| <i>Apis cerana</i> LW                | AB355818         | <i>Heliconius sapho</i> LW          | GU324705    | <i>Pieris rapae</i> violet                      | AB208674    |
| <i>Apis cerana</i> UV                | AB355816         | <i>Heliconius sapho</i> UV1         | GQ451907    | <i>Sogatella furcifera</i> LW                   | AB761150    |
| <i>Apis mellifera</i> SW             | BK005512         | <i>Heliconius sapho</i> UV2         | GQ451908    | <i>Sogatella furcifera</i> UV1                  | AB761151    |
| <i>Apis mellifera</i> LW1            | BK005514         | <i>Indolestes peregrinus</i> RhLWA1 | LC009292    | <i>Sogatella furcifera</i> UV2                  | AB761152    |
| <i>Apis mellifera</i> LW2            | BK005515         | <i>Indolestes peregrinus</i> RhLWA2 | LC009293    | <i>Sympetrum frequens</i> RhLWA1                | LC009060    |
| <i>Apis mellifera</i> UV             | BK005513         | <i>Indolestes peregrinus</i> RhLWC1 | LC009294    | <i>Sympetrum frequens</i> RhLWA2                | LC009061    |
| <i>Ceratosolen solmsi</i> SW         | JX422073         | <i>Indolestes peregrinus</i> RhLWD1 | LC009295    | <i>Sympetrum frequens</i> RhLWB1                | LC009062    |
| <i>Ceratosolen solmsi</i> LW1        | JX422114         | <i>Indolestes peregrinus</i> RhLWD2 | LC009296    | <i>Sympetrum frequens</i> RhLWC1                | LC009063    |
| <i>Ceratosolen solmsi</i> LW2        | JX422151         | <i>Indolestes peregrinus</i> RhLWE1 | LC009297    | <i>Sympetrum frequens</i> RhLWD1                | LC009064    |
| <i>Ceratosolen solmsi</i> UV         | JX422159         | <i>Indolestes peregrinus</i> RhLWE2 | LC009298    | <i>Sympetrum frequens</i> RhLWE1                | LC009065    |
| <i>Danaus plexippus</i> SW           | AY605544         | <i>Indolestes peregrinus</i> RhLWF1 | LC009299    | <i>Sympetrum frequens</i> RhLWF1                | LC009066    |
| <i>Danaus plexippus</i> LW           | AY605545         | <i>Indolestes peregrinus</i> RhSWa1 | LC009300    | <i>Sympetrum frequens</i> RhLWF2                | LC009067    |
| <i>Danaus plexippus</i> UV           | AY605546         | <i>Indolestes peregrinus</i> RhSWb1 | LC009301    | <i>Sympetrum frequens</i> RhLWF3                | LC009068    |
| <i>Dianemobius nigrofasciatus</i> SW | AB291232         | <i>Indolestes peregrinus</i> RhUV   | LC009302    | <i>Sympetrum frequens</i> RhLWF4                | LC009069    |
| <i>Dianemobius nigrofasciatus</i> LW | FJ232921         | <i>Laodelphax striatella</i> LW     | AB761153    | <i>Sympetrum frequens</i> RhSWa1                | LC009070    |
| <i>Dianemobius nigrofasciatus</i> UV | AB458852         | <i>Laodelphax striatella</i> UV1    | AB761154    | <i>Sympetrum frequens</i> RhSWb1                | LC009071    |
| <i>Drosophila melanogaster</i> Rh1   | Flybase: CG4550  | <i>Laodelphax striatella</i> UV2    | AB761155    | <i>Sympetrum frequens</i> RhSWc1                | LC009072    |
| <i>Drosophila melanogaster</i> Rh2   | Flybase: CG16740 | <i>Macroglossum stellatarum</i> SW  | KF539426    | <i>Sympetrum frequens</i> RhSWc2                | LC009073    |
| <i>Drosophila melanogaster</i> Rh3   | Flybase: CG10888 | <i>Macroglossum stellatarum</i> LW  | KF539444    | <i>Sympetrum frequens</i> RhSWc3                | LC009074    |
| <i>Drosophila melanogaster</i> Rh4   | Flybase: CG9668  | <i>Macroglossum stellatarum</i> UV  | KF539456    | <i>Sympetrum frequens</i> RhUV                  | LC009075    |
| <i>Drosophila melanogaster</i> Rh5   | Flybase: CG5279  | <i>Manduca sexta</i> SW             | AD001674    | <i>Thermonectus marmoratus</i> UV2              | EU921225    |
| <i>Drosophila melanogaster</i> Rh6   | Flybase: CG5192  | <i>Manduca sexta</i> LW             | L78080      | <i>Thermonectus marmoratus</i> UV1              | EU921226    |
| <i>Gryllus bimaculatus</i> SW        | HM363622         | <i>Manduca sexta</i> UV             | L78081      | <i>Thermonectus marmoratus</i> LW               | EU921227    |
| <i>Gryllus bimaculatus</i> green1    | HM363620         | <i>Megoura viciae</i> LW            | AF189714    | OUTGROUP <i>Doryteuthis pealeii</i> rhodopsin   | AY450853    |
| <i>Gryllus bimaculatus</i> green2    | HM363621         | <i>Megoura viciae</i> UV            | AF189715    | OUTGROUP <i>Enteroctopus dofleini</i> rhodopsin | X07797      |
| <i>Gryllus bimaculatus</i> UV        | HM363623         | <i>Nephotettix cincticeps</i> SW    | AB761157    | OUTGROUP <i>Loligo forbesii</i> rhodopsin       | X56788      |
| <i>Heliconius melpomene</i> UV1      | GU324678         | <i>Nephotettix cincticeps</i> LW    | AB761156    | OUTGROUP <i>Sepia officinalis</i> rhodopsin     | AF000947    |
| <i>Heliconius melpomene</i> UV2      | GU324679         | <i>Nephotettix cincticeps</i> UV    | AB761158    | OUTGROUP <i>Todarodes pacificus</i> rhodopsin   | X70498      |
| <i>Heliconius melpomene</i> SW       | GU324689         |                                     |             |                                                 |             |

Table S7. Accession numbers for insect and cephalopod (outgroup) opsin sequences included in phylogenetic and selection analyses.
